# Supplementary material
Source: Springer Nature journal article supplement (https://www.springermedizin.de/resource/supplementary/12913_2013_3425_MOESM2_ESM.pdf/9532774)

Health-related quality of life in patients with dizziness

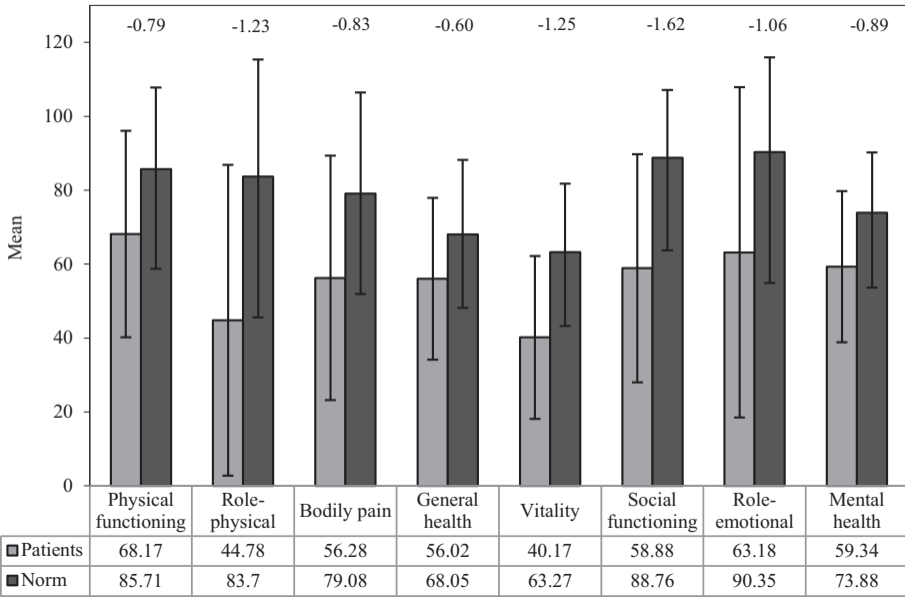

Supplement: MOESM2 [file 9532774]
